# Supplementary material for: Data-flow-based adaption of the System-Theoretic Process Analysis for Security (STPA-Sec)
Source: PeerJ Comput Sci. 2021 Feb 3;7:e362. doi: 10.7717/peerj-cs.362 (PMC7959614; doi:10.7717/peerj-cs.362)
Supplement: Supplemental Information 1 [file peerj-cs-07-362-s001.xlsx]

## Sheet: STPA-DFSec IFBs
Insecure Function Behaviors Identified by STPA-DFSec
Function	Not being Executed Causes Vulnerabilities (NECV)	being Executed Causes Vulnerabilities (ECV)	being executed but Exceeding the Time Limits causes vulnerabilities (ETL)
P_F1: transmit data to D	/	P_F1_IFB1, P_F1_IFB2	P_F1_IFB3
P_F2: encrypt by symm. session key	P_F2_IFB1	P_F2_IFB2, P_F2_IFB4	P_F2_IFB3
P_F3: process plain data	P_F3_IFB1	P_F3_IFB2, P_F3_IFB3	P_F3_IFB4
P_F4: decrypt by P's secret key	P_F4_IFB1	P_F4_IFB2, P_F4_IFB4	P_F4_IFB3
P_F5: calculate P's signature	P_F5_IFB1	P_F5_IFB2	P_F5_IFB3
P_F6: encrypt by S's public key	P_F6_IFB1	P_F6_IFB2, P_F6_IFB4	P_F6_IFB3
P_F7: transmit data to S	/	P_F7_IFB1, P_F7_IFB2	P_F7_IFB3
D_F1: encrypt by S's public key	D_F1_IFB1	D_F1_IFB2, D_F1_IFB4	D_F1_IFB3
D_F2: transmit data to S	/	D_F2_IFB1, D_F2_IFB2	D_F2_IFB3
D_F3: process plain data	D_F3_IFB1	D_F3_IFB2, D_F3_IFB3	D_F3_IFB4
D_F4: decrypt by D's secret key	D_F4_IFB1	D_F4_IFB2, D_F4_IFB4	D_F4_IFB3
D_F5: decrypt by symm. session key	D_F5_IFB1	D_F5_IFB2, D_F5_IFB4	D_F5_IFB3
S_F1: transmit data to P	/	S_F1_IFB1, S_F1_IFB2	S_F1_IFB3
S_F2: encrypt by P's public key	S_F2_IFB1	S_F2_IFB2, S_F2_IFB4	S_F2_IFB3
S_F3: verify P's signature	S_F3_IFB1	S_F3_IFB2	S_F3_IFB3
S_F4: decrypt by S's secret key	S_F4_IFB1	S_F4_IFB2, S_F4_IFB4	S_F4_IFB3
S_F5: process plain data	S_F5_IFB1	S_F5_IFB2, S_F5_IFB3	S_F5_IFB4
S_F6: transmit data to D	/	S_F6_IFB1, S_F6_IFB2	S_F6_IFB3
S_F7: encrypt by D's public key	S_F7_IFB1	S_F7_IFB2, S_F7_IFB4	S_F7_IFB3
U_F1: human operation	/	U_F1_IFB1, U_F1_IFB2, U_F1_IFB3	/
M_F1: human operation	/	M_F1_IFB1, M_F1_IFB2	/
IFB Description
P_F1_IFB1	Data is transmitted with the information leakage possibility. [V-3]
P_F1_IFB2	Data is tampered during the transmission. [V-1/2]
P_F1_IFB3	The function 'transmit data to D' is executed but fails to transmit the required data successfully. [V-2]
P_F2_IFB1	Data is not encrypted, but the function is pretended to have been executed correctly. [V-1/3]
P_F2_IFB2	Data is encrypted by a forged session key. [V-1/3]
P_F2_IFB3	Encryption process takes too long to violate the protocol time limits, which aborts the expected mission. [V-2]
P_F2_IFB4	Data is encrypted with malicious algorithms. [V-1/3]
P_F3_IFB1	Plain data is not processed but protended to be processed, and a fake return is output. [V-1]
P_F3_IFB2	Plain data is processed with information leakage possibilities. [V-3]
P_F3_IFB3	Plain data is processed with tempered data or algorithms. [V-1/2]
P_F3_IFB4	Plain data is processed but violating system specifications (e.g. timing limits). [V-2]
P_F4_IFB1	Data is not able to be decrypted correctly. [V-2]
P_F4_IFB2	Data is decrypted with an illegal key. (cooperating with an illegal data encryption process, i.e. S_F2_IFB2) [V-1/3]
P_F4_IFB3	Decryption process takes too long to violate the protocol time limits, which aborts the expected mission. [V-2]
P_F4_IFB4	Data is decrypted with illegal algorithms. (cooperating with an illegal data encryption process, i.e. S_F2_IFB4) [V-1/3]
P_F5_IFB1	Correct signature is not generated, and a fake result is returned. [V-1]
P_F5_IFB2	Signature is calculated with tempered algorithms. [V-1/2]
P_F5_IFB3	Signature calculation takes too long to violate the protocol time limits. [V-2]
P_F6_IFB1	Data is not encrypted, but the function is pretended to have been executed correctly. [V-1/3]
P_F6_IFB2	Data is encrypted by a forged public key. [V-1/3]
P_F6_IFB3	Encryption process takes too long to violate the protocol time limits, which aborts the expected mission. [V-2]
P_F6_IFB4	Data is encrypted with malicious algorithms. [V-1/3]
P_F7_IFB1	Data is transmitted with the information leakage possibility. [V-3]
P_F7_IFB2	Data is tampered during the transmission. [V-1/2]
P_F7_IFB3	The function 'transmit data to S' is executed but fails to transmit the required data successfully. [V-2]
D_F1_IFB1	Data is not encrypted, but the function is pretended to have been executed correctly. [V-1/3]
D_F1_IFB2	Data is encrypted by a forged public key. [V-1/3]
D_F1_IFB3	Encryption process takes too long to violate the protocol time limits, which aborts the expected mission. [V-2]
D_F1_IFB4	Data is encrypted with malicious algorithms. [V-1/3]
D_F2_IFB1	Data is transmitted with the information leakage possibility. [V-3]
D_F2_IFB2	Data is tampered during the transmission. [V-1/2]
D_F2_IFB3	The function 'transmit data to S' is executed but fails to transmit the required data successfully. [V-2]
D_F3_IFB1	Plain data is not processed but protended to be processed, and a fake return is output. [V-1]
D_F3_IFB2	Plain data is processed with information leakage possibilities. [V-3]
D_F3_IFB3	Plain data is processed with tempered data or algorithms. [V-1/2]
D_F3_IFB4	Plain data is processed but violating system specifications (e.g. timing limits). [V-2]
D_F4_IFB1	Data is not able to be decrypted correctly. [V-2]
D_F4_IFB2	Data is decrypted with an illegal key. (cooperating with an illegal data encryption process, i.e. S_F7_IFB2) [V-1/3]
D_F4_IFB3	Decryption process takes too long to violate the protocol time limits, which aborts the expected mission. [V-2]
D_F4_IFB4	Data is decrypted with illegal algorithms. (cooperating with an illegal data encryption process, i.e. S_F7_IFB4) [V-1/3]
D_F5_IFB1	Data is not able to be decrypted correctly. [V-2]
D_F5_IFB2	Data is decrypted with an illegal key. (cooperating with an illegal data encryption process, i.e. P_F2_IFB2) [V-1/3]
D_F5_IFB3	Decryption process takes too long to violate the protocol time limits, which aborts the expected mission. [V-2]
D_F5_IFB4	Data is decrypted with illegal algorithms. (cooperating with an illegal data encryption process, i.e. P_F2_IFB4) [V-1/3]
S_F1_IFB1	Data is transmitted with the information leakage possibility. [V-3]
S_F1_IFB2	Data is tampered during the transmission. [V-1/2]
S_F1_IFB3	The function 'transmit data to P' is executed but fails to transmit the required data successfully. [V-2]
S_F2_IFB1	Data is not encrypted, but the function is pretended to have been executed correctly. [V-1/3]
S_F2_IFB2	Data is encrypted by a forged public key. [V-1/3]
S_F2_IFB3	Encryption process takes too long to violate the protocol time limits, which aborts the expected mission. [V-2]
S_F2_IFB4	Data is encrypted with malicious algorithms. [V-1/3]
S_F3_IFB1	Signature is not verified, and a fake ok result is returned. [V-1]
S_F3_IFB2	Signature is verified with tempered algorithms. (cooperating with an illegal signature generation process, i.e. P_F5_IFB2) [V-1/2]
S_F3_IFB3	Signature verification takes too long to violate the protocol time limits. [V-2]
S_F4_IFB1	Data is not able to be decrypted correctly. [V-2]
S_F4_IFB2	Data is decrypted with an illegal key. (cooperating with an illegal data encryption process, i.e. P_F6_IFB2, D_F1_IFB2) [V-1/3]
S_F4_IFB3	Decryption process takes too long to violate the protocol time limits, which aborts the expected mission. [V-2]
S_F4_IFB4	Data is decrypted with illegal algorithms. (cooperating with an illegal data encryption process, i.e. P_F6_IFB4, D_F1_IFB4) [V-1/3]
S_F5_IFB1	Plain data is not processed but protended to be processed, and a fake return is output. [V-1]
S_F5_IFB2	Plain data is processed with information leakage possibilities. [V-3]
S_F5_IFB3	Plain data is processed with tempered data or algorithms. [V-1/2]
S_F5_IFB4	Plain data is processed but violating system specifications (e.g. timing limits). [V-2]
S_F6_IFB1	Data is transmitted with the information leakage possibility. [V-3]
S_F6_IFB2	Data is tampered during the transmission. [V-1/2]
S_F6_IFB3	The function 'transmit data to D' is executed but fails to transmit the required data successfully. [V-2]
S_F7_IFB1	Data is not encrypted, but the function is pretended to have been executed correctly. [V-1/3]
S_F7_IFB2	Data is encrypted by a forged public key. [V-1/3]
S_F7_IFB3	Encryption process takes too long to violate the protocol time limits, which aborts the expected mission. [V-2]
S_F7_IFB4	Data is encrypted with malicious algorithms. [V-1/3]
U_F1_IFB1	A human user leak the system login account and password. [V-1/V-3]
U_F1_IFB2	An invalid user pretended to be a valid user to control the vehicle. [V-1]
U_F1_IFB3	A valid user tries to reverse-engineering the system and get sensitive information. (e.g. technical protocol) [V-3]
M_F1_IFB1	A manufacture user leak the system login account and password. [V-3]
M_F1_IFB2	An invalid manufacture user pretended to be a valid user to modify the system configuration. [V-1]

## Sheet: STPA-DFSec LSs
Loss Scenarios Identified by STPA-DFSec
IFB Label	function itself	env - function inputs	env - calling behaviors	env - computing resource	env - links
P_F1_IFB1	P_F1_IFB1_LS1	/	/	/	P_F1_IFB1_LS2
P_F1_IFB2	P_F1_IFB2_LS1	/	/	/	P_F1_IFB2_LS2
P_F1_IFB3	/	/	P_F2_IFB1_LS1	/	P_F1_IFB3_LS1, P_F1_IFB3_LS2
P_F2_IFB1	/	/	/	/	/
P_F2_IFB2	/	P_F2_IFB2_LS1	/	/	/
P_F2_IFB3	P_F2_IFB3_LS1	P_F2_IFB3_LS3	/	P_F2_IFB3_LS2	/
P_F2_IFB4	P_F2_IFB4_LS1	/	/	/	/
P_F3_IFB1	/	/	P_F3_IFB1_LS1	/	/
P_F3_IFB2	P_F3_IFB2_LS1	/	/	/	/
P_F3_IFB3	P_F3_IFB3_LS1, P_F3_IFB3_LS2	P_F3_IFB3_LS3	/	/	/
P_F3_IFB4	P_F3_IFB4_LS1, P_F3_IFB4_LS2	/	/	P_F3_IFB4_LS3	/
P_F4_IFB1	/	/	P_F4_IFB1_LS1	/	/
P_F4_IFB2	/	P_F4_IFB2_LS1	/	/	/
P_F4_IFB3	P_F4_IFB3_LS1	P_F4_IFB3_LS3	/	P_F4_IFB3_LS2	/
P_F4_IFB4	P_F4_IFB4_LS1	/	/	/	/
P_F5_IFB1	/	/	P_F5_IFB1_LS1	/	/
P_F5_IFB2	P_F5_IFB2_LS1	/	/	/	/
P_F5_IFB3	P_F5_IFB3_LS1	/	/	P_F5_IFB3_LS2	/
P_F6_IFB1	/	/	P_F6_IFB1_LS1	/	/
P_F6_IFB2	/	P_F6_IFB2_LS1	/	/	/
P_F6_IFB3	P_F6_IFB3_LS1	P_F6_IFB3_LS3	/	P_F6_IFB3_LS2	/
P_F6_IFB4	P_F6_IFB4_LS1	/	/	/	/
P_F7_IFB1	P_F7_IFB1_LS1	/	/	/	P_F7_IFB1_LS2
P_F7_IFB2	P_F7_IFB2_LS1	/	/	/	P_F7_IFB2_LS2
P_F7_IFB3	/	/	/	/	P_F7_IFB3_LS1, P_F7_IFB3_LS2
D_F1_IFB1	/	/	D_F1_IFB1_LS1	/	/
D_F1_IFB2	/	D_F1_IFB2_LS1	/	/	/
D_F1_IFB3	D_F1_IFB3_LS1	D_F1_IFB3_LS3	/	D_F1_IFB3_LS2	/
D_F1_IFB4	D_F1_IFB4_LS1	/	/	/	/
D_F2_IFB1	D_F2_IFB1_LS1	/	/	/	D_F2_IFB1_LS2
D_F2_IFB2	D_F2_IFB2_LS1	/	/	/	D_F2_IFB2_LS2
D_F2_IFB3	/	/	/	/	D_F2_IFB3_LS1, D_F2_IFB3_LS2
D_F3_IFB1	/	/	D_F3_IFB1_LS1	/
D_F3_IFB2	D_F3_IFB2_LS1	/	/	/	/
D_F3_IFB3	D_F3_IFB3_LS1, D_F3_IFB3_LS2	D_F3_IFB3_LS3	/	/	/
D_F3_IFB4	D_F3_IFB4_LS1, D_F3_IFB4_LS2	/	/	D_F3_IFB4_LS3	/
D_F4_IFB1	/	/	D_F4_IFB1_LS1	/	/
D_F4_IFB2	/	D_F4_IFB2_LS1	/	/	/
D_F4_IFB3	D_F4_IFB3_LS1	D_F4_IFB3_LS3	/	D_F4_IFB3_LS2	/
D_F4_IFB4	D_F4_IFB4_LS1	/	/	/	/
D_F5_IFB1	/	/	D_F5_IFB1_LS1	/	/
D_F5_IFB2	/	D_F5_IFB2_LS1	/	/	/
D_F5_IFB3	D_F5_IFB3_LS1	D_F5_IFB3_LS3	/	D_F5_IFB3_LS2	/
D_F5_IFB4	D_F5_IFB4_LS1	/	/	/	/
S_F1_IFB1	S_F1_IFB1_LS1	/	/	/	S_F1_IFB1_LS2
S_F1_IFB2	S_F1_IFB2_LS1	/	/	/	S_F1_IFB2_LS2
S_F1_IFB3	/	/	/	/	S_F1_IFB3_LS1, S_F1_IFB3_LS2
S_F2_IFB1	/	/	S_F2_IFB1_LS1	/	/
S_F2_IFB2	/	S_F2_IFB2_LS1	/	/	/
S_F2_IFB3	S_F2_IFB3_LS1	S_F2_IFB3_LS3	/	S_F2_IFB3_LS2	/
S_F2_IFB4	S_F2_IFB4_LS1	/	/	/	/
S_F3_IFB1	/	/	S_F3_IFB1_LS1	/	/
S_F3_IFB2	S_F3_IFB2_LS1	/	/	/	/
S_F3_IFB3	S_F3_IFB3_LS1	/	/	S_F3_IFB3_LS2	/
S_F4_IFB1	/	/	S_F4_IFB1_LS1	/	/
S_F4_IFB2	/	S_F4_IFB2_LS1	/	/	/
S_F4_IFB3	S_F4_IFB3_LS1	S_F4_IFB3_LS3	/	S_F4_IFB3_LS2	/
S_F4_IFB4	S_F4_IFB4_LS1	/	/	/	/
S_F5_IFB1	/	/	S_F5_IFB1_LS1	/	/
S_F5_IFB2	S_F5_IFB2_LS1	/	/	/	/
S_F5_IFB3	S_F5_IFB3_LS1, S_F5_IFB3_LS2	S_F5_IFB3_LS3	/	/	/
S_F5_IFB4	S_F5_IFB4_LS1, S_F5_IFB4_LS2	/	/	S_F5_IFB4_LS3	/
S_F6_IFB1	S_F6_IFB1_LS1	/	/	/	S_F6_IFB1_LS2
S_F6_IFB2	S_F6_IFB2_LS1	/	/	/	S_F6_IFB2_LS2
S_F6_IFB3	/	/	/	/	S_F6_IFB3_LS1, S_F6_IFB3_LS2
S_F7_IFB1	/	/	S_F7_IFB1_LS1	/	/
S_F7_IFB2	/	S_F7_IFB2_LS1	/	/	/
S_F7_IFB3	S_F7_IFB3_LS1	S_F7_IFB3_LS3	/	S_F7_IFB3_LS2	/
S_F7_IFB4	S_F7_IFB4_LS1	/	/	/	/
U_F1_IFB1	U_F1_IFB1_LS1	/	/	/	/
U_F1_IFB2	U_F1_IFB2_LS1	/	/	/	/
U_F1_IFB3	U_F1_IFB3_LS1	/	/	/	/
M_F1_IFB1	M_F1_IFB1_LS1	/	/	/	/
M_F1_IFB2	M_F1_IFB2_LS1	/	/	/	/
IFB Label	LS Label	Guidewords	LS Description
P_F1_IFB1	P_F1_IFB1_LS1	function itself	No or inadequate mechanism related to the function 'transmit data to D'is used to protect data confidentiality.
P_F1_IFB1	P_F1_IFB1_LS2	env - links	The output links to another component are not protected, the adversary can eavesdropped data on links.
P_F1_IFB2	P_F1_IFB2_LS1	function itself	No or inadequate mechanism related to the function 'transmit data to D'is used to protect data integrity.
P_F1_IFB2	P_F1_IFB2_LS2	env - links	The output links to another component are not protected, the adversary can tamper data on links.
P_F1_IFB3	P_F1_IFB3_LS1	env - links	Data is blocked (e.g. broken or shorten links) on links or routed to an unexpected destination.
P_F1_IFB3	P_F1_IFB3_LS2	env - links	Transmission is slowed down by additional mechanisms on links.
P_F2_IFB1	P_F2_IFB1_LS1	env - calling behaviors	The function 'encrypt by symm. session key' is bypassed by the adversary and fake an output.
P_F2_IFB2	P_F2_IFB2_LS1	env - function inputs	A forged key is used when encrypting the data.
P_F2_IFB3	P_F2_IFB3_LS1	function itself	The algorithm is tampered, which needs more computing resources.
P_F2_IFB3	P_F2_IFB3_LS2	env - computing resource	Computing resource is occupied to cause violation of execution timing limitations.
P_F2_IFB3	P_F2_IFB3_LS3	env - function inputs	The input data length is not checked but exceeds the limitation.
P_F2_IFB4	P_F2_IFB4_LS1	function itself	Algorithm is maliciously modified by the attacker.
P_F3_IFB1	P_F3_IFB1_LS1	env - calling behaviors	The function 'process plain data' is bypassed by the adversary and fake an output.
P_F3_IFB2	P_F3_IFB2_LS1	function itself	No or inadequate mechanism related to the function 'process plain data' is used to protect data confidentiality.
P_F3_IFB3	P_F3_IFB3_LS1	function itself	No or inadequate mechanism related to the function 'process plain data' is used to check the data integrity.
P_F3_IFB3	P_F3_IFB3_LS2	function itself	The function algorithm is tampered by the attacker.
P_F3_IFB3	P_F3_IFB3_LS3	env - function inputs	The supporting data (e.g. system states) is tampered, which leads to the process being executed wrongly.
P_F3_IFB4	P_F3_IFB4_LS1	function itself	The algorithm is tampered, which leads to unexpected process behaviors (e.g. reject legal request) of the function.
P_F3_IFB4	P_F3_IFB4_LS2	function itself	The algorithm is tampered, which needs more computing resources.
P_F3_IFB4	P_F3_IFB4_LS3	env - computing resource	Computing resource is occupied to cause violation of execution timing limitations.
P_F4_IFB1	P_F4_IFB1_LS1	env - calling behaviors	The function 'decrypt by P's secret key' is bypassed by the adversary and fake an output.
P_F4_IFB2	P_F4_IFB2_LS1	env - function inputs	A forged key is used when decrypting the data.
P_F4_IFB3	P_F4_IFB3_LS1	function itself	The algorithm is tampered, which needs more computing resources.
P_F4_IFB3	P_F4_IFB3_LS2	env - computing resource	Computing resource is occupied to cause violation of execution timing limitations.
P_F4_IFB3	P_F4_IFB3_LS3	env - function inputs	The input data length is not checked but exceeds the limitation.
P_F4_IFB4	P_F4_IFB4_LS1	function itself	Algorithm is maliciously modified by the attacker.
P_F5_IFB1	P_F5_IFB1_LS1	env - calling behaviors	The function 'calculate P's signature' is bypassed by the adversary and fake an output.
P_F5_IFB2	P_F5_IFB2_LS1	function itself	The algorithm is tampered, which leads to generating an incorrect signature.
P_F5_IFB3	P_F5_IFB3_LS1	function itself	The algorithm is tampered, which leads to violating the time limits.
P_F5_IFB3	P_F5_IFB3_LS2	env - computing resource	Computing resource is occupied to cause violation of execution timing limitations.
P_F6_IFB1	P_F6_IFB1_LS1	env - calling behaviors	The function 'encrypt by S's public key' is bypassed by the adversary and fake an output.
P_F6_IFB2	P_F6_IFB2_LS1	env - function inputs	A forged key is used when encrypting the data.
P_F6_IFB3	P_F6_IFB3_LS1	function itself	The algorithm is tampered, which needs more computing resources.
P_F6_IFB3	P_F6_IFB3_LS2	env - computing resource	Computing resource is occupied to cause violation of execution timing limitations.
P_F6_IFB3	P_F6_IFB3_LS3	env - function inputs	The input data length is not checked but exceeds the limitation.
P_F6_IFB4	P_F6_IFB4_LS1	function itself	Algorithm is maliciously modified by the attacker.
P_F7_IFB1	P_F7_IFB1_LS1	function itself	No or inadequate mechanism related to the function 'transmit data to S' is used to protect data confidentiality.
P_F7_IFB1	P_F7_IFB1_LS2	env - links	The output links to another component are not protected, the adversary can eavesdropped data on links.
P_F7_IFB2	P_F7_IFB2_LS1	function itself	No or inadequate mechanism related to the function 'transmit data to S' is used to protect data integrity.
P_F7_IFB2	P_F7_IFB2_LS2	env - links	The output links to another component are not protected, the adversary can tamper data on links.
P_F7_IFB3	P_F7_IFB3_LS1	env - links	Data is blocked (e.g. broken or shorten links) on links or routed to an unexpected destination.
P_F7_IFB3	P_F7_IFB3_LS2	env - links	Transmission is slowed down by additional mechanisms on links.
D_F1_IFB1	D_F1_IFB1_LS1	env - calling behaviors	The function 'encrypt by S's public key' is bypassed by the adversary and fake an output.
D_F1_IFB2	D_F1_IFB2_LS1	env - function inputs	A forged key is used when encrypting the data.
D_F1_IFB3	D_F1_IFB3_LS1	function itself	The algorithm is tampered, which needs more computing resources.
D_F1_IFB3	D_F1_IFB3_LS2	env - computing resource	Computing resource is occupied to cause violation of execution timing limitations.
D_F1_IFB3	D_F1_IFB3_LS3	env - function inputs	The input data length is not checked but exceeds the limitation.
D_F1_IFB4	D_F1_IFB4_LS1	function itself	Algorithm is maliciously modified by the attacker.
D_F2_IFB1	D_F2_IFB1_LS1	function itself	No or inadequate mechanism related to the function 'transmit data to S' is used to protect data confidentiality.
D_F2_IFB1	D_F2_IFB1_LS2	env - links	The output links to another component are not protected, the adversary can eavesdropped data on links.
D_F2_IFB2	D_F2_IFB2_LS1	function itself	No or inadequate mechanism related to the function 'transmit data to S' is used to protect data integrity.
D_F2_IFB2	D_F2_IFB2_LS2	env - links	The output links to another component are not protected, the adversary can tamper data on links.
D_F2_IFB3	D_F2_IFB3_LS1	env - links	Data is blocked (e.g. broken or shorten links) on links or routed to an unexpected destination.
D_F2_IFB3	D_F2_IFB3_LS2	env - links	Transmission is slowed down by additional mechanisms on links.
D_F3_IFB1	D_F3_IFB1_LS1	env - calling behaviors	The function 'process plain data' is bypassed by the adversary and fake an output.
D_F3_IFB2	D_F3_IFB2_LS1	function itself	No or inadequate mechanism related to the function 'process plain data' is used to protect data confidentiality.
D_F3_IFB3	D_F3_IFB3_LS1	function itself	No or inadequate mechanism related to the function 'process plain data' is used to check the data integrity.
D_F3_IFB3	D_F3_IFB3_LS2	function itself	The function algorithm is tampered by the attacker.
D_F3_IFB3	D_F3_IFB3_LS3	env - function inputs	The supporting data (e.g. system states) is tampered, which leads to the process being executed wrongly.
D_F3_IFB4	D_F3_IFB4_LS1	function itself	The algorithm is tampered, which leads to unexpected process behaviors (e.g. reject legal request) of the function.
D_F3_IFB4	D_F3_IFB4_LS2	function itself	The algorithm is tampered, which needs more computing resources.
D_F3_IFB4	D_F3_IFB4_LS3	env - computing resource	Computing resource is occupied to cause violation of execution timing limitations.
D_F4_IFB1	D_F4_IFB1_LS1	env - calling behaviors	The function 'decrypt by D's secret key' is bypassed by the adversary and fake an output.
D_F4_IFB2	D_F4_IFB2_LS1	env - function inputs	A forged key is used when decrypting the data.
D_F4_IFB3	D_F4_IFB3_LS1	function itself	The algorithm is tampered, which needs more computing resources.
D_F4_IFB3	D_F4_IFB3_LS2	env - computing resource	Computing resource is occupied to cause violation of execution timing limitations.
D_F4_IFB3	D_F4_IFB3_LS3	env - function inputs	The input data length is not checked but exceeds the limitation.
D_F4_IFB4	D_F4_IFB4_LS1	function itself	Algorithm is maliciously modified by the attacker.
D_F5_IFB1	D_F5_IFB1_LS1	env - calling behaviors	The function 'decrypt by symm. session key' is bypassed by the adversary and fake an output.
D_F5_IFB2	D_F5_IFB2_LS1	env - function inputs	A forged key is used when decrypting the data.
D_F5_IFB3	D_F5_IFB3_LS1	function itself	The algorithm is tampered, which needs more computing resources.
D_F5_IFB3	D_F5_IFB3_LS2	env - computing resource	Computing resource is occupied to cause violation of execution timing limitations.
D_F5_IFB3	D_F5_IFB3_LS3	env - function inputs	The input data length is not checked but exceeds the limitation.
D_F5_IFB4	D_F5_IFB4_LS1	function itself	Algorithm is maliciously modified by the attacker.
S_F1_IFB1	S_F1_IFB1_LS1	function itself	No or inadequate mechanism related to the function 'transmit data to P' is used to protect data confidentiality.
S_F1_IFB1	S_F1_IFB1_LS2	env - links	The output links to another component are not protected, the adversary can eavesdropped data on links.
S_F1_IFB2	S_F1_IFB2_LS1	function itself	No or inadequate mechanism related to the function 'transmit data to P' is used to protect data integrity.
S_F1_IFB2	S_F1_IFB2_LS2	env - links	The output links to another component are not protected, the adversary can tamper data on links.
S_F1_IFB3	S_F1_IFB3_LS1	env - links	Data is blocked (e.g. broken or shorten links) on links or routed to an unexpected destination.
S_F1_IFB3	S_F1_IFB3_LS2	env - links	Transmission is slowed down by additional mechanisms on links.
S_F2_IFB1	S_F2_IFB1_LS1	env - calling behaviors	The function 'encrypt by P's public key' is bypassed by the adversary and fake an output.
S_F2_IFB2	S_F2_IFB2_LS1	env - function inputs	A forged key is used when encrypting the data.
S_F2_IFB3	S_F2_IFB3_LS1	function itself	The algorithm is tampered, which needs more computing resources.
S_F2_IFB3	S_F2_IFB3_LS2	env - computing resource	Computing resource is occupied to cause violation of execution timing limitations.
S_F2_IFB3	S_F2_IFB3_LS3	env - function inputs	The input data length is not checked but exceeds the limitation.
S_F2_IFB4	S_F2_IFB4_LS1	function itself	Algorithm is maliciously modified by the attacker.
S_F3_IFB1	S_F3_IFB1_LS1	env - calling behaviors	The function 'verify P's signature' is bypassed by the adversary and fake an output.
S_F3_IFB2	S_F3_IFB2_LS1	function itself	The algorithm is tampered, which leads to a wrong verification result.
S_F3_IFB3	S_F3_IFB3_LS1	function itself	The algorithm is tampered, which leads to violating the time limits.
S_F3_IFB3	S_F3_IFB3_LS2	env - computing resource	Computing resource is occupied to cause violation of execution timing limitations.
S_F4_IFB1	S_F4_IFB1_LS1	env - calling behaviors	The function 'decrypt by S's secret key' is bypassed by the adversary and fake an output.
S_F4_IFB2	S_F4_IFB2_LS1	env - function inputs	A forged key is used when decrypting the data.
S_F4_IFB3	S_F4_IFB3_LS1	function itself	The algorithm is tampered, which needs more computing resources.
S_F4_IFB3	S_F4_IFB3_LS2	env - computing resource	Computing resource is occupied to cause violation of execution timing limitations.
S_F4_IFB3	S_F4_IFB3_LS3	env - function inputs	The input data length is not checked but exceeds the limitation.
S_F4_IFB4	S_F4_IFB4_LS1	function itself	Algorithm is maliciously modified by the attacker.
S_F5_IFB1	S_F5_IFB1_LS1	env - calling behaviors	The function 'process plain data' is bypassed by the adversary and fake an output.
S_F5_IFB2	S_F5_IFB2_LS1	function itself	No or inadequate mechanism related to the function 'process plain data' is used to protect data confidentiality.
S_F5_IFB3	S_F5_IFB3_LS1	function itself	No or inadequate mechanism related to the function 'process plain data' is used to check the data integrity.
S_F5_IFB3	S_F5_IFB3_LS2	function itself	The function algorithm is tampered by the attacker.
S_F5_IFB3	S_F5_IFB3_LS3	env - function inputs	The supporting data (e.g. system states) is tampered, which leads to the process being executed wrongly.
S_F5_IFB4	S_F5_IFB4_LS1	function itself	The algorithm is tampered, which leads to unexpected process behaviors (e.g. reject legal request) of the function.
S_F5_IFB4	S_F5_IFB4_LS2	function itself	The algorithm is tampered, which needs more computing resources.
S_F5_IFB4	S_F5_IFB4_LS3	env - computing resource	Computing resource is occupied to cause violation of execution timing limitations.
S_F6_IFB1	S_F6_IFB1_LS1	function itself	No or inadequate mechanism related to the function 'transmit data to D' is used to protect data confidentiality.
S_F6_IFB1	S_F6_IFB1_LS2	env - links	The output links to another component are not protected, the adversary can eavesdropped data on links.
S_F6_IFB2	S_F6_IFB2_LS1	function itself	No or inadequate mechanism related to the function 'transmit data to D' is used to protect data integrity.
S_F6_IFB2	S_F6_IFB2_LS2	env - links	The output links to another component are not protected, the adversary can tamper data on links.
S_F6_IFB3	S_F6_IFB3_LS1	env - links	Data is blocked (e.g. broken or shorten links) on links or routed to an unexpected destination.
S_F6_IFB3	S_F6_IFB3_LS2	env - links	Transmission is slowed down by additional mechanisms on links.
S_F7_IFB1	S_F7_IFB1_LS1	env - calling behaviors	The function 'encrypt by P's public key' is bypassed by the adversary and fake an output.
S_F7_IFB2	S_F7_IFB2_LS1	env - function inputs	A forged key is used when encrypting the data.
S_F7_IFB3	S_F7_IFB3_LS1	function itself	The algorithm is tampered, which needs more computing resources.
S_F7_IFB3	S_F7_IFB3_LS2	env - computing resource	Computing resource is occupied to cause violation of execution timing limitations.
S_F7_IFB3	S_F7_IFB3_LS3	env - function inputs	The input data length is not checked but exceeds the limitation.
S_F7_IFB4	S_F7_IFB4_LS1	function itself	Algorithm is maliciously modified by the attacker.
U_F1_IFB1	U_F1_IFB1_LS1	function itself	The account and password are leaked by the user (e.g. stolen by someone or publish it by accident).
U_F1_IFB2	U_F1_IFB2_LS1	function itself	The authenticated phone is used by an invalid user without being detected.
U_F1_IFB3	U_F1_IFB3_LS1	function itself	The valid user is not an honest user.
M_F1_IFB1	M_F1_IFB1_LS1	function itself	The account and password are leaked by the manufacture (e.g. stolen by someone or publish it by accident).
M_F1_IFB2	M_F1_IFB2_LS1	function itself	The authenticated device is used by an invalid user without being detected.

## Sheet:  STPA-Sec ICA
Insecure Control Actions Identified by STPA-Sec
Control Actions (CA)	Not providing	Providing cause	Too early, too late, out of order; stopped too soon, applied too long
D_CA1: Door controller registers at the server.	D_CA1_ICA1	D_CA1_ICA2	/
P_CA1: Smartphone registers at the server(i.e send account ID, password and P's public key to S).	P_CA1_ICA1	P_CA1_ICA2	/
P_CA2: Smartphone requests a session key from the server.	P_CA2_ICA1	P_CA2_ICA2	P_CA2_ICA3
P_CA3: Smartphone sends (un)lock commands to the door controller.	P_CA3_ICA1	P_CA3_ICA2	P_CA3_ICA3
P_CA4: Smartphone logins at server .	P_CA4_ICA1	P_CA4_ICA2	/
S_CA1: Server assigns a session key to door controller	S_CA1_ICA1	S_CA1_ICA2	S_CA1_ICA3
U_CA1: User registers a user account.	/	U_CA1_ICA1	/
U_CA2: User lock or unlocks doors.	/	U_CA2_ICA1	/
U_CA3: User logins a user account.	/	U_CA3_ICA1
M_CA1:Manufacturer registers a vehicle account	/	M_CA1_ICA1	/
Insecure Control Action (ICA) description
D_CA1_ICA1	Door controller does not register at the server correctly. [V-2]
D_CA1_ICA2	Door controller registers with data leakage risks. (e.g. UID, public key leakage). [V-3]
P_CA1_ICA1	Smartphone does not register at the server correctly. [V-2]
P_CA1_ICA2	Smartphone register is done successfully, but sensitive information (account ID and password) is leaked. [V-3]
P_CA2_ICA1	Smartphone fails to request a session key. [V-2]
P_CA2_ICA2	Smartphone obtains a fake session key after request. [V-1]
P_CA2_ICA3	Smartphone requests a session key but does not obey the required specification (e.g. do not request in the correct time window). [V-2]
P_CA3_ICA1	Smartphone fails to send (un)lock commands. [V-2]
P_CA3_ICA2	Smartphone sends wrong commands. (e.g. always unlock command) [V-1/2]
P_CA3_ICA3	Smartphone sends the control commands but does not obey the required specification. (e.g. send commands after the assigned session key is expired.) [V-2]
P_CA4_ICA1	Smartphone cannot login the server correctly. [V-2]
P_CA4_ICA2	Smartphone login the account successfully, but sensitive information (account ID and password) is leaked. [V-3]
S_CA1_ICA1	Server fails to assign the session key to the door controller. [V-2]
S_CA1_ICA2	Server assigns a fake session key to the door controller. [V-1]
S_CA1_ICA3	Server assigns a session key but does not obey the required specification (e.g. do not request in the correct time window). [V-2]
U_CA1_ICA1	User register is done successfully, but sensitive information (account ID and password) is leaked. [V-3]
U_CA2_ICA1	An invalid user controls the door. [V-1]
U_CA3_ICA1	User login is done successfully, but sensitive information (account ID and password) is leaked. [V-3]
M_CA1_ICA1	Manufacturer finished a vehicle register, but sensitive information (account ID and password) is leaked. [V-3]

## Sheet:  STPA-Sec LS
Loss Scenarios Identified by STPA-Sec
ICAs	Controller Itself	Control Path	Controlled Process	Feedback Path
D_CA1_ICA1	D_CA1_ICA1_LS1	D_CA1_ICA1_LS2	D_CA1_ICA1_LS3	D_CA1_ICA1_LS4
D_CA1_ICA2	D_CA1_ICA2_LS1	D_CA1_ICA2_LS2	D_CA1_ICA2_LS3	/
P_CA1_ICA1	P_CA1_ICA1_LS1	P_CA1_ICA1_LS2	P_CA1_ICA1_LS3	P_CA1_ICA1_LS4
P_CA1_ICA2	P_CA1_ICA2_LS1	P_CA1_ICA2_LS2	P_CA1_ICA2_LS3	/
P_CA2_ICA1	P_CA2_ICA1_LS1	P_CA2_ICA1_LS2	P_CA2_ICA1_LS3	P_CA2_ICA1_LS4
P_CA2_ICA2	/	P_CA2_ICA2_LS1	P_CA2_ICA2_LS2	P_CA2_ICA2_LS3
P_CA2_ICA3	P_CA2_ICA3_LS1	P_CA2_ICA3_LS2	/	/
P_CA3_ICA1	P_CA3_ICA1_LS1	P_CA3_ICA1_LS2	P_CA3_ICA1_LS3	P_CA3_ICA1_LS4
P_CA3_ICA2	P_CA3_ICA2_LS1	P_CA3_ICA2_LS2	/	/
P_CA3_ICA3	P_CA3_ICA3_LS1	P_CA3_ICA3_LS2	/	/
P_CA4_ICA1	P_CA4_ICA1_LS1	P_CA4_ICA1_LS2	P_CA4_ICA1_LS3	P_CA4_ICA1_LS4
P_CA4_ICA2	P_CA4_ICA2_LS1	P_CA4_ICA2_LS2	P_CA4_ICA2_LS3	/
S_CA1_ICA1	S_CA1_ICA1_LS1	S_CA1_ICA1_LS2	S_CA1_ICA1_LS3	S_CA1_ICA1_LS4
S_CA1_ICA2	S_CA1_ICA2_LS1	S_CA1_ICA2_LS2	S_CA1_ICA2_LS3	/
S_CA1_ICA3	S_CA1_ICA3_LS1	S_CA1_ICA3_LS2	/	/
U_CA1_ICA1	U_CA1_ICA1_LS1	U_CA1_ICA1_LS2	/	/
U_CA2_ICA1	U_CA2_ICA1_LS1	/	/	/
U_CA3_ICA1	U_CA3_ICA1_LS1	U_CA3_ICA1_LS1	/	/
M_CA1_ICA1	M_CA1_ICA1_LS1	M_CA1_ICA1_LS2	/	/
Loss Scenario (LS) description
D_CA1_ICA1_LS1	Software of the door controller is tampered and does not work as expected.
D_CA1_ICA1_LS2	Transmitted register data is blocked on the control path.
D_CA1_ICA1_LS3	Software of the server is tampered and does not work as expected.
D_CA1_ICA1_LS4	Feedback data is tampered on feedback links and returns a fake result to the door controller.
D_CA1_ICA2_LS1	Sensitive information is obtained illegally at the door controller side.
D_CA1_ICA2_LS2	Sensitive information is monitored on the control path.
D_CA1_ICA2_LS3	Sensitive information is obtained illegally at the server.
P_CA1_ICA1_LS1	Software of the smartphone is tampered and does not work as expected.
P_CA1_ICA1_LS2	Transmitted register data is blocked on the control path.
P_CA1_ICA1_LS3	Software of the server is tampered and does not work as expected.
P_CA1_ICA1_LS4	Feedback data is tampered on feedback links and returns a fake result to the smartphone.
P_CA1_ICA2_LS1	Sensitive information is obtained illegally at the smartphone side.
P_CA1_ICA2_LS2	Sensitive information is eavesdropped on the control path.
P_CA1_ICA2_LS3	Sensitive information is obtained illegally at the server side.
P_CA2_ICA1_LS1	Software of the smartphone is tampered and does not work as expected.
P_CA2_ICA1_LS2	Transmitted register data is blocked on the control path.
P_CA2_ICA1_LS3	Software of the server is tampered and does not work as expected.
P_CA2_ICA1_LS4	Feedback data is tampered on feedback links and returns a fake result to the smartphone.
P_CA2_ICA2_LS1	The valid control path is linked to a fake destination, which leads to a forged key return.
P_CA2_ICA2_LS2	The valid key is tampered at the server
P_CA2_ICA2_LS3	The valid key is tampered on the feedback path.
P_CA2_ICA3_LS1	Software of the smartphone is tampered and does not obey the required specification.
P_CA2_ICA3_LS2	The control path is blocked or slowed down to lead to the violation of the transmission specification.
P_CA3_ICA1_LS1	Software of the smartphone is tampered and does not work as expected.
P_CA3_ICA1_LS2	Transmitted register data is blocked on the control path.
P_CA3_ICA1_LS3	Software of the server is tampered and does not work as expected.
P_CA3_ICA1_LS4	Feedback data is tampered on feedback links and returns a fake result to the smartphone.
P_CA3_ICA2_LS1	Software of the smartphone is tampered and sends modified commands.
P_CA3_ICA2_LS2	Commands are tampered on the control path
P_CA3_ICA3_LS1	Software of the smartphone is tampered and does not send commands in time.
P_CA3_ICA3_LS2	The control path is blocked or slowed down to lead to the violation of the time limits.
P_CA4_ICA1_LS1	Software of the smartphone is tampered and does not work as expected.
P_CA4_ICA1_LS2	Transmitted login data is blocked on the control path.
P_CA4_ICA1_LS3	Software of the server is tampered and does not work as expected.
P_CA4_ICA1_LS4	Feedback data is tampered on feedback links and returns a fake result to the smartphone.
P_CA4_ICA2_LS1	Sensitive information is obtained illegally at the smartphone side.
P_CA4_ICA2_LS2	Sensitive information is monitored on the control path.
P_CA4_ICA2_LS3	Sensitive information is obtained illegally at the server side.
S_CA1_ICA1_LS1	Software of the server is tampered and does not work as expected.
S_CA1_ICA1_LS2	Transmitted assigned key is blocked on the control path.
S_CA1_ICA1_LS3	Software of the door controller is tampered and can not receive the assigned key correctly.
S_CA1_ICA1_LS4	Feedback data from the door controller is tampered on feedback links and returns a fake result to the server.
S_CA1_ICA2_LS1	Legal session key is tampered at the server.
S_CA1_ICA2_LS2	Legal session key is tampered when being transmitted.
S_CA1_ICA2_LS3	Legal session key is tampered at the door controller.
S_CA1_ICA3_LS1	Software of the server is tampered and does not assign a legal session within the required time window.
S_CA1_ICA3_LS2	Session key is blocked or slowed down on the transmission path to violate the time limits.
U_CA1_ICA1_LS1	User exposes the register data by himself intendedly or unintendedly.
U_CA1_ICA1_LS2	User provides the register information to the smartphone but someone beside sees the register information.
U_CA2_ICA1_LS1	User do not protect his smartphone well and an invalid user uses an authenticated smartphone to control the door illegally.
U_CA1_ICA3_LS1	User exposes the login data by himself intendedly or unintendedly.
U_CA1_ICA3_LS2	User provides the login information to the smartphone but someone beside sees the register information.
M_CA1_ICA1_LS1	Manufacturer exposes the register information by itself intendedly or unintendedly.
M_CA1_ICA1_LS2	Manufacturer operates register process but someone else monitors the process and gets the register information.
